# Supplementary material for: Effects of Microecological Regulators on Rheumatoid Arthritis: A Systematic Review and Meta-Analysis of Randomized, Controlled Trials
Source: Nutrients. 2023 Feb 22;15(5):1102. doi: 10.3390/nu15051102 (PMC10005357; doi:10.3390/nu15051102)
Supplement: Supplementary file 1 [file nutrients-15-01102-s001.zip]

Archive with 5 entries (5 files):
- Figure S1 Funnel plot of DAS28.tif
- Figure S1.pdf
- Figure S2.pdf
- Funnel plot of CRP.tif
- Table S1 PRISMA_2020_checklist.pdf
