# Supplementary figures and images for: Effects of Microecological Regulators on Rheumatoid Arthritis: A Systematic Review and Meta-Analysis of Randomized, Controlled Trials
Source: MDPI journal article supplement (doi:10.3390/nu15051102), 2023-02-22

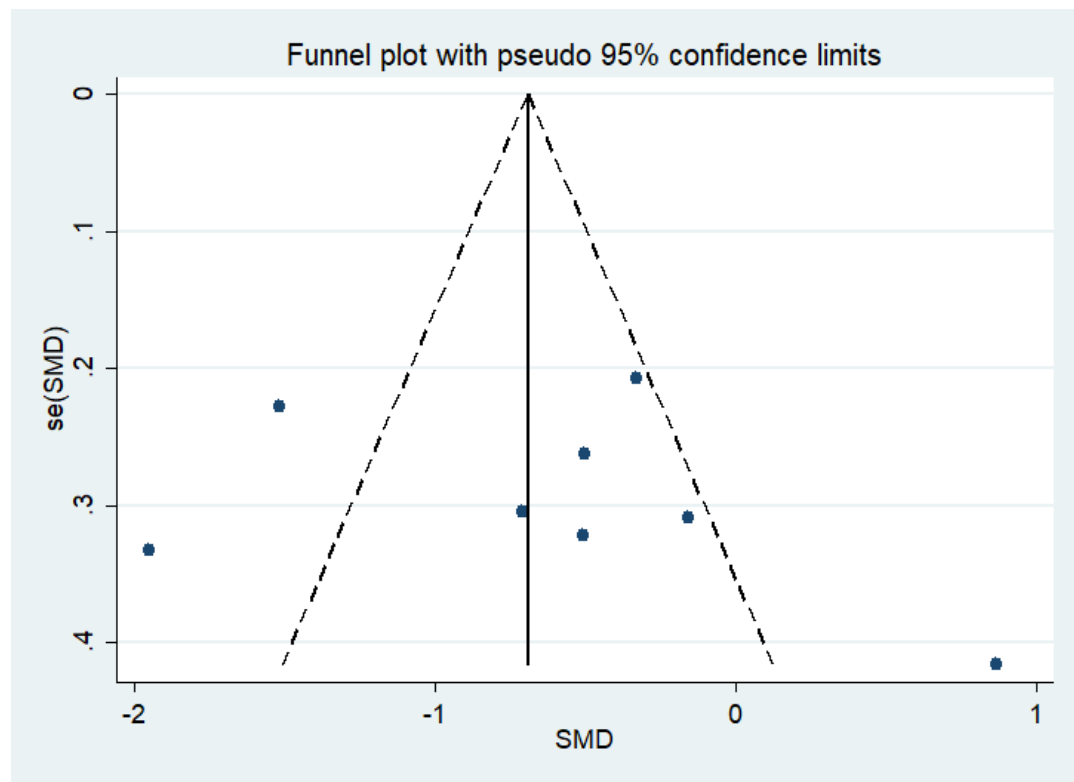

(A)

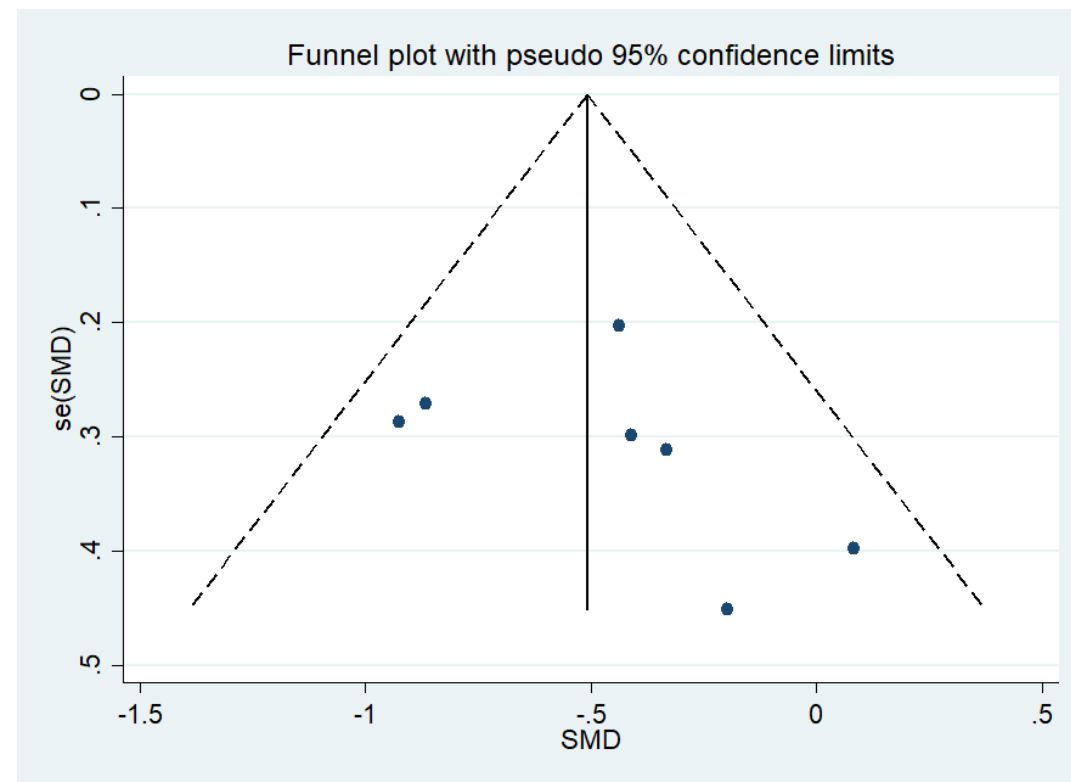

(B)

Figure S1: Funnel plot of DAS28 and CRP. (A) DAS28, (B) CRP

Supplement: s1 [file s1]

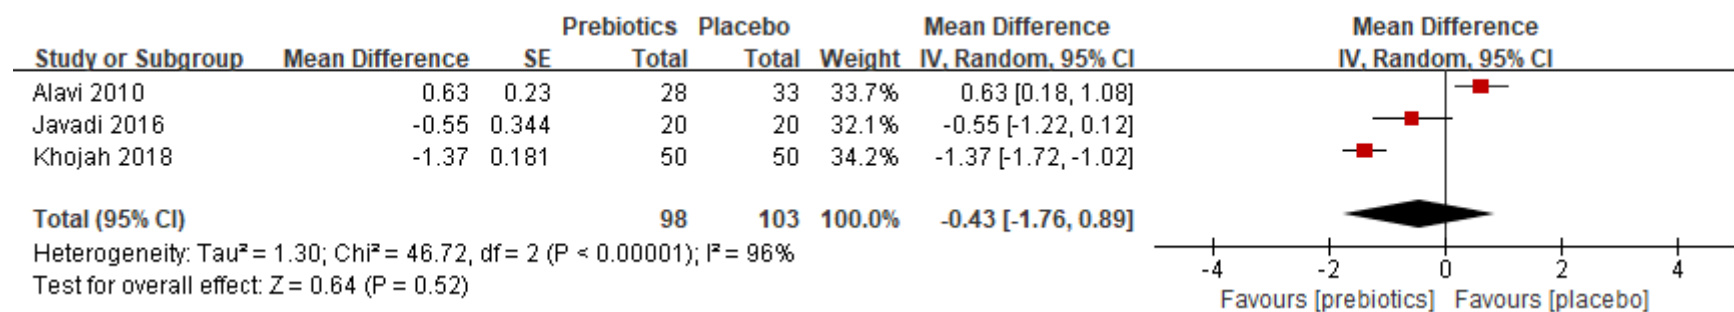

Figure S2: Forest plot of DAS28 variations in subgroup analysis of prebiotics

Supplement: s1 [file s1]
